# Supplementary material
Source: publisher figshare collection journal article supplement (https://acs.figshare.com/ndownloader/files/20502516)
Supplement: Supplementary file 1 [file 20502516]

## Supporting Information

---

### **CC2 Benchmark for models of phenylalanine protein chains: 0-0 transition energies and IR signatures of the $\pi\pi^*$ excited state.**

*Mi-Song Dupuy,<sup>†</sup> Eric Gloaguen, Benjamin Tardivel, Michel Mons and Valérie Brenner\**  
LIDYL, CEA, CNRS, Université Paris-Saclay, 91191 Gif-sur-Yvette, France.

Appendix S1: Definition of the characteristic dihedral angles of the backbone of capped peptides.

Appendix S2: Characteristic geometrical parameters of the DFT-D optimized geometry of the ground state ( $S_0$ ) of the four Fa conformers.

Appendix S3: Comparison of the CC2/cc-pVXZ (X=D and T) optimized geometries of both the  $S_0$  and  $S_1$  states for the four Fa conformers.

Appendix S4: *Amide A* region frequencies of both the ground ( $S_0$ ) and  $\pi\pi^*$  excited ( $S_1$ ) states of the four Fa conformers.

Appendix S5: ZPVE of both the ground ( $S_0$ ) and  $\pi\pi^*$  excited ( $S_1$ ) states according to the basis set for the four Fa conformers.

Appendix S6: Comparison of the CC2/cc-pVDZ optimized geometry of the  $S_0$  and  $S_1$  states of Fa B and D.

Appendix S7: Characteristic geometrical parameters of CC2/cc-pVDZ optimized geometry of both the ground ( $S_0$ ) and lowest  $\pi\pi^*$  excited ( $S_1$ ) states of the Fm, GFa, FFa and QFa conformers.

Appendix S8: Comparison of the CC2/cc-pVDZ optimized geometry of the  $S_0$  and  $S_1$  states of the Fm, GFa, FFa and QFa conformers.

Appendix S9: *Amide A* region frequencies of both the ground ( $S_0$ ) and  $\pi\pi^*$  excited ( $S_1$ ) states of the Fm, GFa, FFa and QFa conformers.

Appendix S10: Experimental vs. CC2/cc-pVDZ calculated harmonic *amide A* region frequencies of both the  $S_0$  and  $S_1$  states of the series of capped peptides and the corresponding mode-dependent linear ( $\nu_{\text{exp.}} = a\nu_{\text{theo.}} + b$ ) scaling functions.

Appendix S11: DFT-D structures of the ground state of QFa A, B and C

References

Appendix S1: Definition of the characteristic dihedral angles of the backbone of capped peptides.

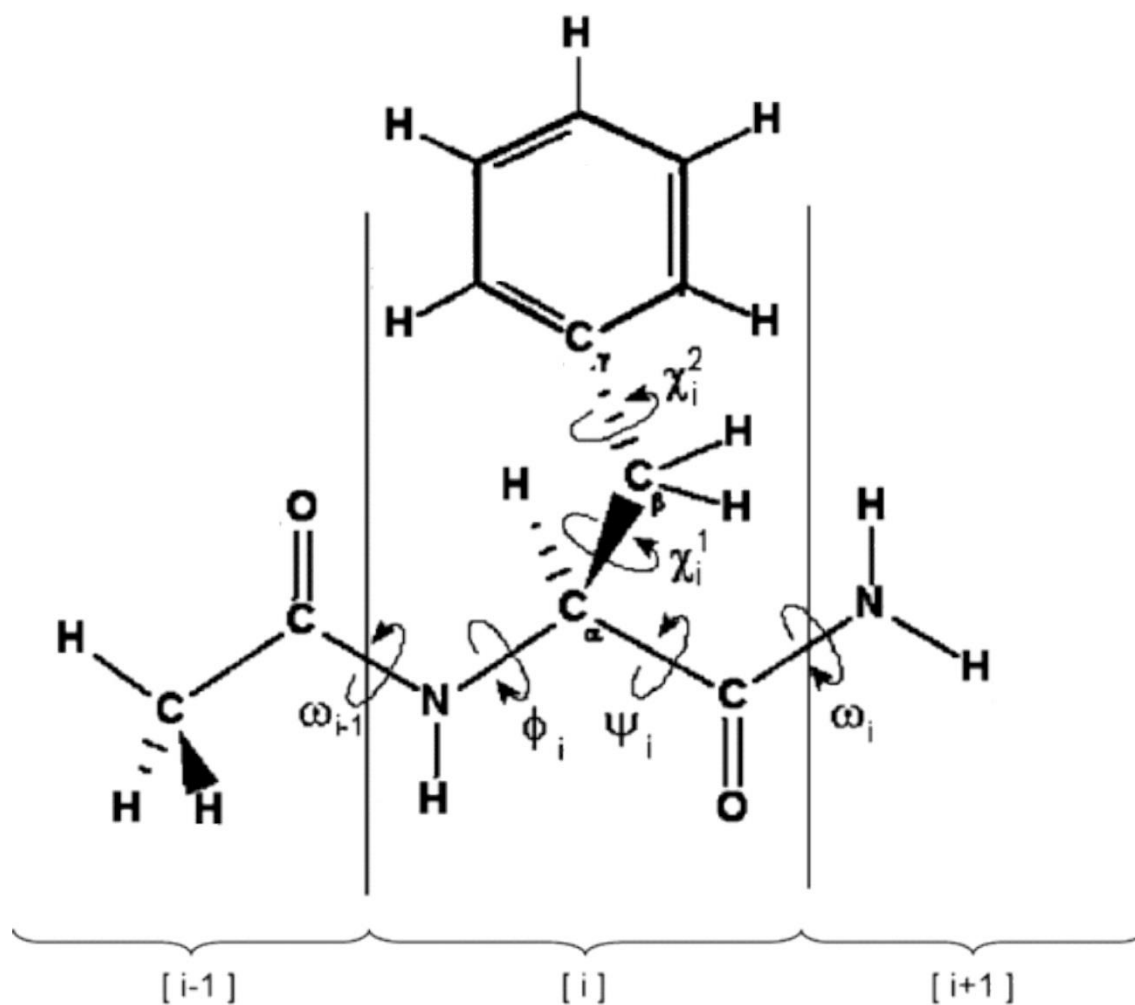

Figure S1: Definition of the characteristic dihedral angles of the backbone of capped peptides: Example of N-Ac-Phe-NH<sub>2</sub> (Fa) from the N-terminus (left-most [i-1] module) through the central Phe (central [i] module) to C-terminal NH<sub>2</sub> protecting group (right-most [i+1] module).

Appendix S2: Characteristic geometrical parameters of the DFT-D optimized geometry of the ground state ( $S_0$ ) of the four Fa conformers.

|       |   | Dihedral angles ( $^\circ$ ) <sup>a</sup> |        |          | Intermolecular distances ( $\text{\AA}$ ) |                                      |
|-------|---|-------------------------------------------|--------|----------|-------------------------------------------|--------------------------------------|
|       |   | $\Phi$                                    | $\Psi$ | $\chi^1$ | $d_{\text{NH}\dots\text{O}}$              | $d_{\text{NH}\dots\pi}$ <sup>b</sup> |
| $S_0$ | A | -160                                      | 159    | 192      | 2.28                                      | 2.56 (3.37, 2.84)                    |
|       | B | -83                                       | 55     | 44       | 2.02                                      | 2.44 (3.23, 2.54)                    |
|       | C | -85                                       | 72     | -55      | 2.03                                      | 2.77 (3.76, 2.85)                    |
|       | D | -83                                       | 84     | 193      | 2.24                                      |                                      |

Table S2: Characteristic geometrical parameters of the ground state ( $S_0$ ) of the four Fa conformers optimized at the DFT-D level.<sup>1-2</sup>

<sup>a</sup> For the definition of the dihedral angles, see the Supporting Information (Figure S1).

<sup>b</sup> The  $\text{NH}\dots\pi$  bond is characterized by three distances: the distance of the  $\text{NH}_{\text{Phe}}$  (A conformer) or  $\text{NH}_2$  (B conformer and C conformer) hydrogen atom with the  $\text{C}_\gamma$  carbon atom of the phenylalanine residue and given in parentheses by the two distances with the two  $\text{C}_\delta$  carbon atoms ( $\text{C}_\delta^{\text{C-term}}$ ,  $\text{C}_\delta^{\text{N-term}}$ ) of the phenylalanine residue.

Appendix S3: Comparison of the CC2/cc-pVXZ (X=D and T) optimized geometries of both the  $S_0$  and  $S_1$  states for the four Fa conformers.

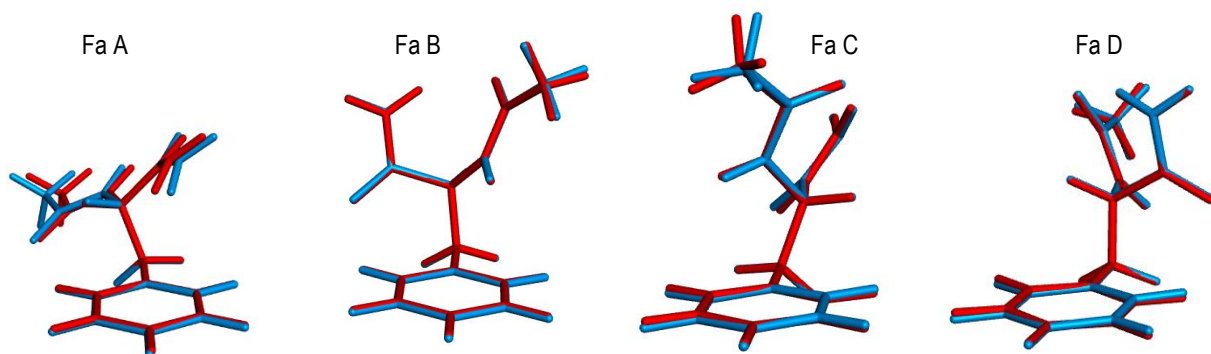

Figure S3-1: Comparison of the CC2/cc-pVDZ (blue) and CC2/cc-VTZ (red) optimized geometries of the  $S_0$  state for the four Fa conformers. For each conformer, the phenyl rings have been overlapped.

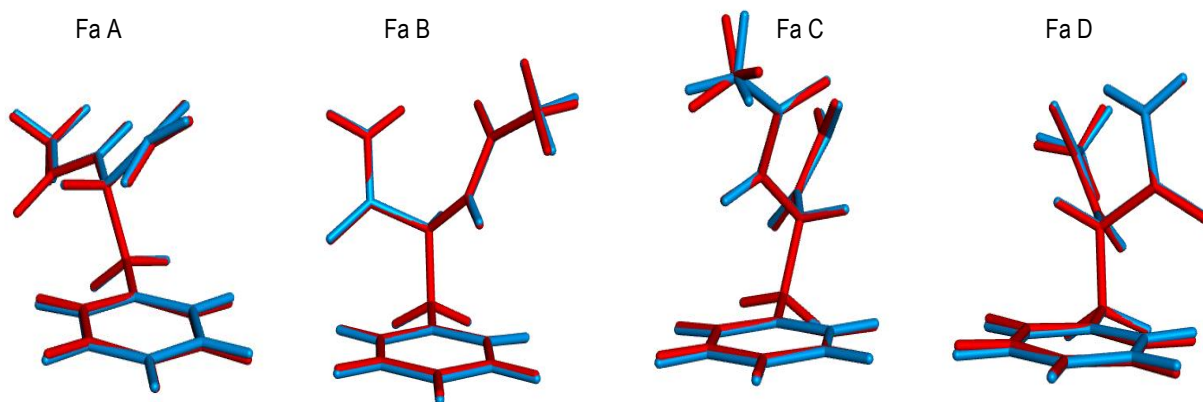

Figure S3-2: Comparison of the CC2/cc-pVDZ (blue) and CC2/cc-VTZ (red) optimized geometries of the  $S_1$  state for the four Fa conformers. For each conformer, the phenyl rings have been overlapped.

Appendix S4: *Amide A* region frequencies of both the ground ( $S_0$ ) and  $\pi\pi^*$  excited ( $S_1$ ) states of the four Fa conformers.

| Conformer/State   |       | NH <sub>phe</sub> | NH <sub>2 sym.</sub> | NH <sub>2 anti.</sub> |
|-------------------|-------|-------------------|----------------------|-----------------------|
| <b>cc-pVDZ</b>    |       |                   |                      |                       |
| Fa A              | $S_1$ | 3594              | 3546                 | 3695                  |
|                   | $S_0$ | 3583              | 3561                 | 3713                  |
| Fa B              | $S_1$ | 3545              | 3469                 | 3689                  |
|                   | $S_0$ | 3589              | 3474                 | 3690                  |
| Fa C              | $S_1$ | 3553              | 3473                 | 3674                  |
|                   | $S_0$ | 3597              | 3476                 | 3675                  |
| Fa D              | $S_1$ | 3618              | 3498                 | 3677                  |
|                   | $S_0$ | 3618              | 3500                 | 3677                  |
| <b>Experiment</b> |       |                   |                      |                       |
| Fa A              | $S_1$ | 3434              | 3417                 | 3535                  |
|                   | $S_0$ | 3433              | 3426                 | 3541                  |
| Fa C              | $S_1$ | 3439              | 3344                 | 3514                  |
|                   | $S_0$ | 3463              | 3345                 | 3515                  |
| <b>cc-pVTZ</b>    |       |                   |                      |                       |
| Fa A              | $S_1$ | 3590              | 3549                 | 3698                  |
|                   | $S_0$ | 3588              | 3569                 | 3712                  |
| Fa B              | $S_1$ | 3524              | 3454                 | 3686                  |
|                   | $S_0$ | 3577              | 3460                 | 3687                  |
| Fa C              | $S_1$ | 3560              | 3463.9               | 3688                  |
|                   | $S_0$ | 3614              | 3471                 | 3683                  |
| Fa D              | $S_1$ | 3627              | 3501                 | 3682                  |
|                   | $S_0$ | 3627              | 3504                 | 3681                  |

Table S4: CC2/cc-pVXZ (X=D and T) *amide A* region frequencies ( $\text{cm}^{-1}$ ) of both the ground ( $S_0$ ) and  $\pi\pi^*$  excited ( $S_1$ ) states of the four Fa conformers, together with the available experimental ones.

Appendix S5: ZPVE of both the ground ( $S_0$ ) and  $\pi\pi^*$  excited ( $S_1$ ) states according to the basis set for the four Fa conformers.

|       |         |   | ZPVE (au) |
|-------|---------|---|-----------|
| $S_0$ | cc-pVDZ | A | 0.238368  |
|       |         | B | 0.239126  |
|       |         | C | 0.238832  |
|       |         | D | 0.239007  |
|       | cc-pVTZ | A | 0.238510  |
|       |         | B | 0.239284  |
|       |         | C | 0.238696  |
|       |         | D | 0.239019  |
| $S_1$ | cc-pVDZ | A | 0.232277  |
|       |         | B | 0.232950  |
|       |         | C | 0.232845  |
|       |         | D | 0.232960  |
|       | cc-pVTZ | A | 0.232336  |
|       |         | B | 0.233100  |
|       |         | C | 0.232730  |
|       |         | D | 0.232907  |

Table S5: ZPVE (au) of the optimized geometry of both the ground ( $S_0$ ) and  $\pi\pi^*$  excited ( $S_1$ ) states obtained at the CC2/cc-pVXD (X=D and T) levels for the four Fa conformers. The values for  $S_0$  state at the DFT-D/TZVPP level are 0.233370 (A), 0.233924 (B), 0.233337 (C) and 0.233567 (D).

Appendix S6: Comparison of the CC2/cc-pVDZ optimized geometry of the  $S_0$  and  $S_1$  states of Fa B and D.

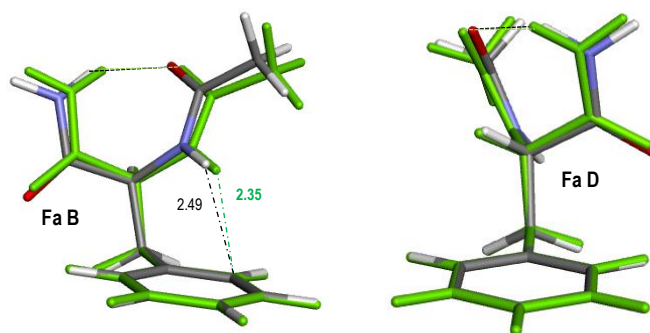

Figure S6: Comparison of the CC2/cc-pVDZ optimized geometries of the  $S_0$  (atom-based colors) and  $S_1$  (green) states for Fa B and D. For each conformer, the phenyl rings have been overlapped. Only distances (dash-dot) that vary significantly ( $|d| > 0.01 \text{ \AA}$ ) between the ground and the excited state (see Table 1) are mentioned.

Appendix S7: Characteristic geometrical parameters of CC2/cc-pVDZ optimized geometry of both the ground ( $S_0$ ) and lowest  $\pi\pi^*$  excited ( $S_1$ ) states of the Fm, GFA, FFa and QFa conformers.

| Fm    |   | Dihedral angles ( $^\circ$ ) <sup>a</sup> |        |          | Intramolecular distances ( $\text{\AA}$ ) |                                      |
|-------|---|-------------------------------------------|--------|----------|-------------------------------------------|--------------------------------------|
|       |   | $\Phi$                                    | $\Psi$ | $\chi^1$ | $d_{\text{NH}\dots\text{O}}$              | $d_{\text{NH}\dots\pi}$ <sup>b</sup> |
| $S_0$ | A | -163                                      | 152    | 183      | 2.22                                      | 2.59 (2.94, 2.80)                    |
|       | B | -83                                       | 60     | 41       | 1.92                                      | 2.34 (2.50, 3.10)                    |
|       | C | -89                                       | 75     | -51      | 1.96                                      | 2.58 (3.48, 2.72)                    |
| $S_1$ | A | -165                                      | 153    | 177      | 2.23                                      | 2.54 (3.02, 2.54)                    |
|       | B | -84                                       | 60     | 43       | 1.92                                      | 2.35 (2.33, 3.28)                    |
|       | C | -89                                       | 75     | -50      | 1.96                                      | 2.52 (3.49, 2.53)                    |

Table S7-1: Characteristic geometrical parameters of CC2/cc-pVDZ optimized geometry of both the ground ( $S_0$ ) and lowest  $\pi\pi^*$  excited ( $S_1$ ) states of the Fm conformers.

<sup>a</sup> For the definition of the dihedral angles, see the Supporting Information (Figure S1).

<sup>b</sup> The  $\text{NH}\dots\pi$  bond is characterized by three distances: the distance of the  $\text{NH}_{\text{phe}}$  (A conformer) or  $\text{NH}_{\text{C-term}}$  (B and C conformer) hydrogen atom with the  $\text{C}_\gamma$  carbon atom of the phenyl residue and given in parentheses by the two distances with the two  $\text{C}_\delta$  carbon atoms ( $\text{C}_\delta^{\text{to C-term}}$ ,  $\text{C}_\delta^{\text{to N-term}}$ ) of the phenyl residue.

| GFA   |    | Dihedral angles ( $^\circ$ ) <sup>a</sup> |          |            | Dihedral angles ( $^\circ$ ) |          |            | Intramolecular distances ( $\text{\AA}$ ) |                                      |
|-------|----|-------------------------------------------|----------|------------|------------------------------|----------|------------|-------------------------------------------|--------------------------------------|
|       |    | $\Phi_1$                                  | $\Psi_1$ | $\chi_1^1$ | $\Phi_2$                     | $\Psi_2$ | $\chi_2^1$ | $d_{\text{NH}\dots\text{O}}$ <sup>b</sup> | $d_{\text{NH}\dots\pi}$ <sup>c</sup> |
| $S_0$ | A  | -81                                       | 67       |            | -84                          | 79       | -59        | 1.96 - 1.99                               | 2.87 (3.86, 3.03)                    |
|       | A' | -279                                      | 295      |            | -81                          | 80       | -57        | 1.92 - 1.99                               |                                      |
|       | B  | -71                                       | 346      |            | -91                          | 9        | 53         | 1.92                                      | 2.45 (3.29, 2.48)                    |
|       | B' | -304                                      | 220      |            | -100                         | 14       | 55         | 2.01                                      | 2.64 (3.47, 2.67)                    |
|       | C  | -115                                      | 166      |            | -161                         | 161      | 193        | 2.26 - 2.16                               | 2.48 (2.67, 2.95)                    |
| $S_1$ | A  | -80                                       | 71       |            | -86                          | 78       | -55        | 1.95 - 1.98                               | 2.70 (3.54, 3.06)                    |
|       | A' | -279                                      | 293      |            | -80                          | 80       | -56        | 1.93 - 1.99                               |                                      |
|       | B  | -70                                       | 345      |            | -91                          | 9        | 53         | 1.91                                      | 2.44 (3.33, 2.40)                    |
|       | B' | -304                                      | 220      |            | -95                          | 10       | 57         | 2.01                                      | 2.60 (3.50, 2.56)                    |
|       | C  | -113                                      | 166      |            | -165                         | 155      | 181        | 2.28 - 2.21                               | 2.52 (2.92, 2.63)                    |

Table S7-2: Characteristic geometrical parameters of CC2/cc-pVDZ optimized geometry of both the ground ( $S_0$ ) and lowest  $\pi\pi^*$  excited ( $S_1$ ) states of the GFA conformers.

<sup>a</sup> For the definition of the dihedral angles, see the Supporting Information (Figure S1). The residue 1 correspond to the first residue from the N terminal cap, the N-term.

<sup>b</sup> A and A' conformers: the two distances correspond to the two  $\text{C}_7$  hydrogen bond distances. B and B' conformers, the distance is that of the  $\text{C}_{10}$  H-bond. C conformer: the two distances correspond to the two  $\text{C}_5$  H-bond distances.

<sup>c</sup> The  $\text{NH}\dots\pi$  bond is characterized by three distances: the distance of  $\text{NH}_{\text{phe}}$  (B and B' conformer) or  $\text{NH}_2$  (C conformer) hydrogen atom with the  $\text{C}_\gamma$  carbon atom of the phenylalanine residue and given in parentheses by the two distances with the two  $\text{C}_\delta$  carbon atoms ( $\text{C}_\delta^{\text{to C-term}}$ ,  $\text{C}_\delta^{\text{to N-term}}$ ) of the phenylalanine residue.



| FFa            |                | Dihedral angles (°) <sup>a</sup> |                |                             | Dihedral angles (°) |                |                             | Intramolecular distances (Å)     |                                       |
|----------------|----------------|----------------------------------|----------------|-----------------------------|---------------------|----------------|-----------------------------|----------------------------------|---------------------------------------|
|                |                | Φ <sub>1</sub>                   | Ψ <sub>1</sub> | χ <sub>1</sub> <sup>1</sup> | Φ <sub>2</sub>      | Ψ <sub>2</sub> | χ <sub>2</sub> <sup>1</sup> | d <sub>NH...O</sub> <sup>b</sup> | d <sub>NH...π</sub> <sup>c</sup>      |
| S <sub>0</sub> | A              | -69                              | 353            | 62                          | -110                | 14             | 51                          | 2.15                             | [2.62, 2.54] -[2.42, 2.41]            |
|                | B              | -153                             | 27             | 51                          | -95                 | 75             | -41                         | 2.05                             | [2.70, 2.85] -[2.45, 3.00]            |
|                | C              | -163                             | 151            | 181                         | -80                 | 70             | 45                          | 1.99 - 2.24                      | 2.60 (2.94, 2.74) - 2.49 (3.41, 2.50) |
| S <sub>1</sub> | A <sub>1</sub> | -68                              | 349            | 61                          | -103                | 12             | 52                          | 2.10                             | [2.59, 2.47] - [2.43, 2.41]           |
|                | A <sub>2</sub> | -69                              | 352            | 62                          | -111                | 12             | 50                          | 2.17                             | [2.63, 2.56] - [2.38, 2.33]           |
|                | B <sub>1</sub> | -151                             | 24             | 52                          | -95                 | 75             | -40                         | 2.03                             | [2.66, 2.78] - [2.43, 2.99]           |
|                | B <sub>2</sub> | -152                             | 27             | 51                          | -95                 | 75             | -40                         | 2.05                             | [2.68, 2.87] - [2.42, 2.94]           |
|                | C              | -160                             | 161            | 182                         | -73                 | 67             | 41                          | 1.96 - 2.21                      | 2.46 (2.62, 3.15) - 2.24 (3.23, 2.17) |

Table S7-3: Characteristic geometrical parameters of CC2/cc-pVDZ optimized geometry of both the ground (S<sub>0</sub>) and lowest  $\pi\pi^*$  excited (S<sub>1</sub>) states of the FFa (Ac-Phe1-Phe2-NH<sub>2</sub>) conformers.

<sup>a</sup> For the definition of the dihedral angles, see the Supporting Information (Figure S1). The residue 1 correspond to the first residue from the N-term.

<sup>b</sup> A, A<sub>1</sub> and A<sub>2</sub> conformers: the distance corresponds to the C<sub>10</sub> hydrogen bond distances. B, B<sub>1</sub> and B<sub>2</sub> conformers, the distance is that of the C<sub>7</sub> H-bond. C conformer: the distances correspond to the C<sub>7</sub> and the C<sub>5</sub> H-bond distances.

<sup>c</sup> The NH... $\pi$  bond is characterized by two group of distances. A and B conformers: the distances of the NH<sub>Phe1</sub> hydrogen atom with the C <sub>$\gamma$</sub>  and the C <sub>$\delta^{\text{to N-term}}$</sub>  carbon atoms of Phe1 and those of the NH<sub>Phe2</sub> hydrogen atom with the C <sub>$\gamma$</sub>  and the C <sub>$\delta^{\text{to N-term}}$</sub>  carbon atoms of Phe2. C conformer: the distances of the NH<sub>Phe2</sub> hydrogen atom with the C <sub>$\gamma$</sub>  and the two C <sub>$\delta$</sub>  carbon atoms (C <sub>$\delta^{\text{to C-term}}$</sub>  and C <sub>$\delta^{\text{to N-term}}$</sub> ) of Phe1 and those of the same hydrogen atom with the C <sub>$\gamma$</sub>  and the two C <sub>$\delta$</sub>  carbon atoms (C <sub>$\delta^{\text{to C-term}}$</sub>  and C <sub>$\delta^{\text{to N-term}}$</sub> ) carbon atoms of Phe2.

| QFa            |   | Dihedral angles (°) <sup>a</sup> |                |                             | Dihedral angles (°) |                |                             | Intramolecular distances (Å)     |                                  |
|----------------|---|----------------------------------|----------------|-----------------------------|---------------------|----------------|-----------------------------|----------------------------------|----------------------------------|
|                |   | Φ <sub>1</sub>                   | Ψ <sub>1</sub> | χ <sub>1</sub> <sup>1</sup> | Φ <sub>2</sub>      | Ψ <sub>2</sub> | χ <sub>2</sub> <sup>1</sup> | d <sub>NH...O</sub> <sup>b</sup> | d <sub>NH...π</sub> <sup>c</sup> |
| S <sub>0</sub> | A | -74                              | 349            | -63                         | -93                 | 10             | 53                          | 1.82 - 2.00                      | 2.33 (3.25, 2.47)                |
|                | B | -76                              | 348            | 79                          | -106                | 13             | -58                         | 1.87 - 2.01                      | 2.86 (2.63, 2.75)                |
|                | C | -69                              | 343            | 71                          | -96                 | 14             | 51                          | 1.85 - 1.99                      | 2.43 (3.19, 2.43)                |
| S <sub>1</sub> | A | -65                              | 340            | -58                         | -106                | 15             | 47                          | 1.83 - 2.06                      | 2.37 (3.07, 2.35)                |
|                | B | -69                              | 341            | 67                          | -112                | 16             | -50                         | 1.84 - 2.04                      | 2.92 (2.81, 2.36)                |
|                | C | -69                              | 342            | 69                          | -97                 | 14             | 48                          | 1.85 - 2.00                      | 2.39 (3.11, 2.39)                |

Table S7-4: Characteristic geometrical parameters of CC2/cc-pVDZ optimized geometry of both the ground (S<sub>0</sub>) and lowest  $\pi\pi^*$  excited (S<sub>1</sub>) states of the QFa conformers.

<sup>a</sup> For the definition of the dihedral angles, see the Supporting Information (Figure S1). The residue 1 correspond to the first residue from the N-term.

<sup>b</sup> The two distances correspond to the C<sub>7</sub> and C<sub>10</sub> H-bond distances.

<sup>c</sup> The NH... $\pi$  bond is characterized by three distances: the distance of the NH<sub>Phe</sub> (A and C conformer) or NH<sub>2,chain</sub> group (B conformer) hydrogen atom with the C <sub>$\gamma$</sub>  (A and C conformer) or C <sub>$\xi$</sub>  (B conformer) carbon atom of the phenylalanine residue and in parentheses, the two distances with the two C <sub>$\delta$</sub>  carbon atoms (C <sub>$\delta^{\text{to C-term}}$</sub> , C <sub>$\delta^{\text{to N-term}}$</sub> ) of the phenylalanine residue (A and C conformers) or with the C <sub>$\delta^{\text{to C-term}}$</sub>  and C <sub>$\epsilon^{\text{to C-term}}$</sub>  carbon atoms (B conformer).

Appendix S8: Comparison of the CC2/cc-pVDZ optimized geometry of the  $S_0$  and  $S_1$  states of the Fm, GFa, FFa and QFa conformers.

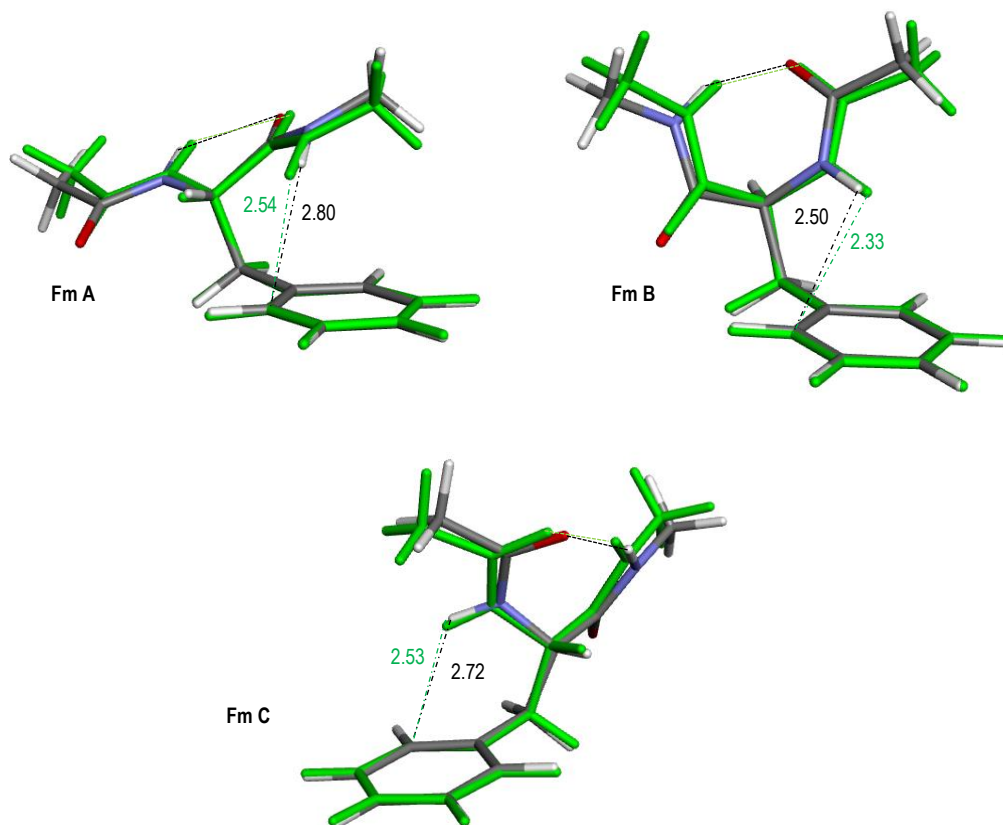

Figure S8-1: Comparison of the CC2/cc-pVDZ optimized geometry of the  $S_0$  (atom-based colors) and  $S_1$  states (green) of the Fm conformers. For each conformer, the phenyl rings have been overlapped. Only distances (dash-dot) that vary significantly ( $|d| > 0.01 \text{ \AA}$ ) between the ground and the excited state (see Table S7.1) are mentioned.

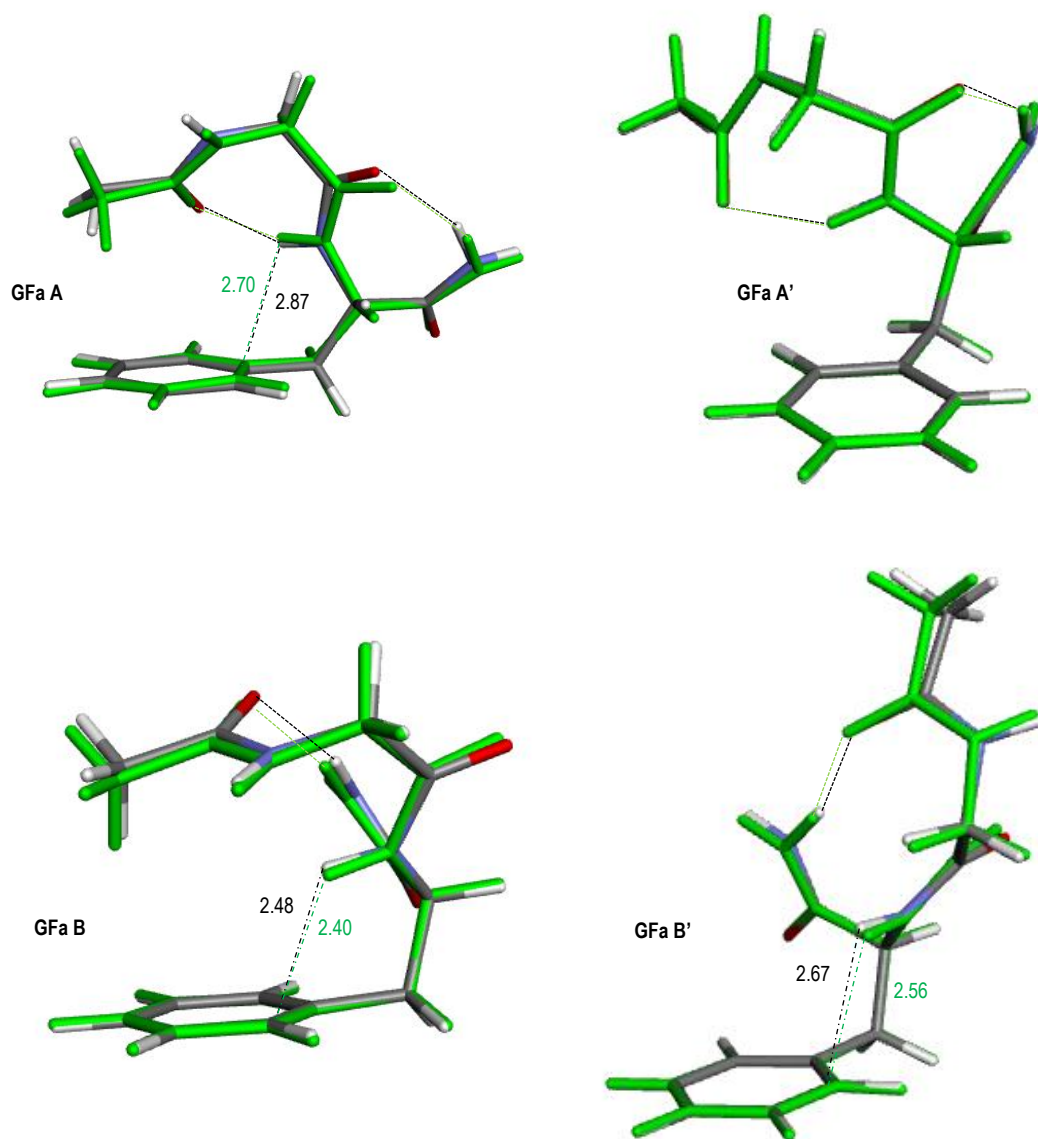

Figure S8-2: Comparison of the CC2/cc-pVDZ optimized geometry of the S<sub>0</sub> (atom-based colors) and S<sub>1</sub> states (green) of GFa A, A', B and B'. For each conformer, the phenyl rings have been overlapped. Only distances (dash-dot) that vary significantly ( $|d| > 0.01$  Å) between the ground and the excited state (see Table S7.2) are mentioned.

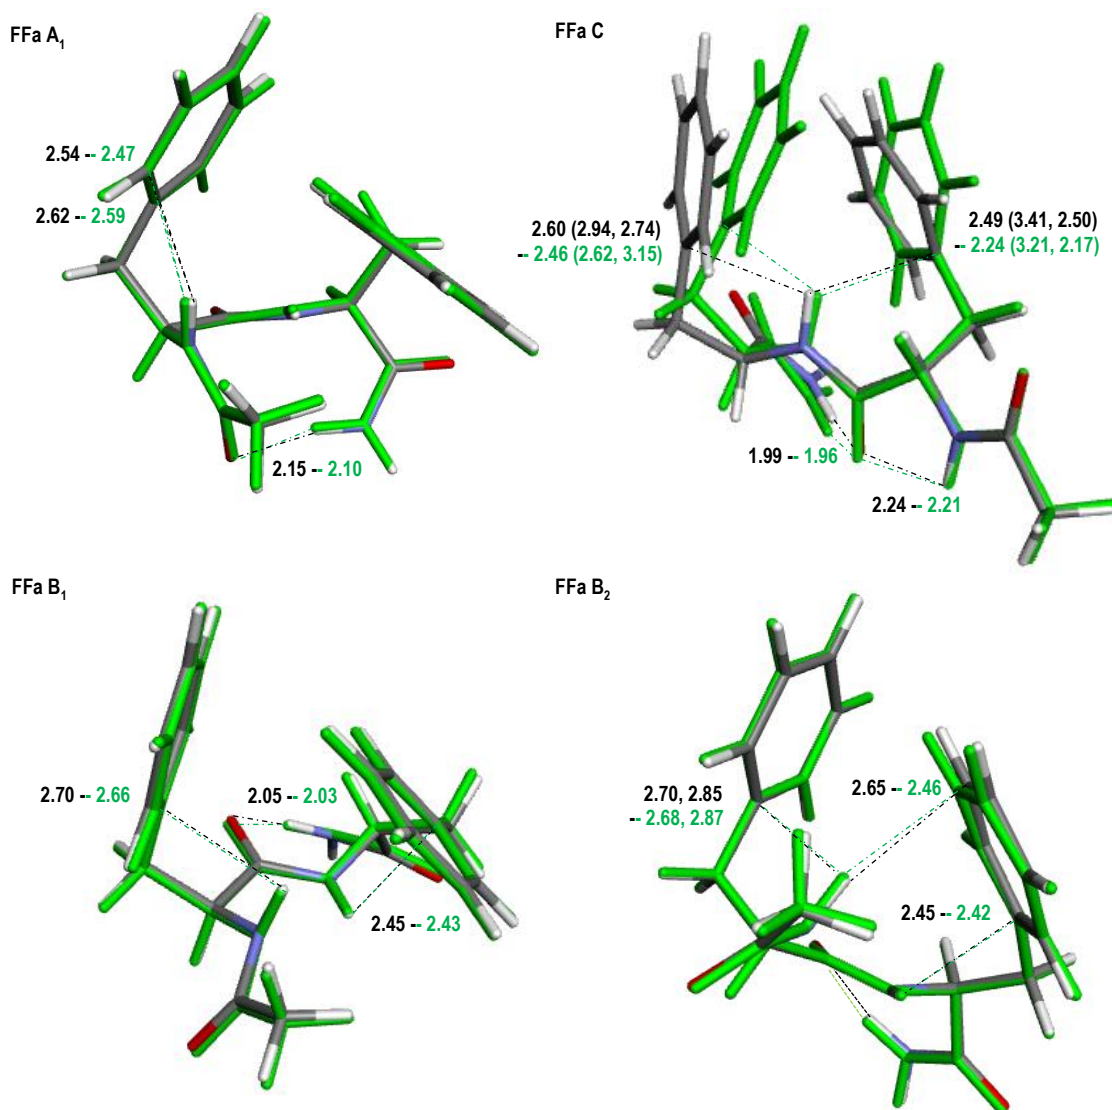

Figure S8-3: Comparison of the CC2/cc-pVDZ optimized geometry of the S<sub>0</sub> (atom-based colors) and S<sub>1</sub> states (green) of FFa A<sub>1</sub>, B<sub>1</sub>, B<sub>2</sub> and C. The phenyl rings have been overlapped for all conformers except FFa C for which this is not possible. In this latter case, the backbones until Phe1 are overlapped. Only distances (dash-dot) that vary significantly ( $|d| > 0.01$  Å) between the ground and the excited state (see Table S7.3) are mentioned. In the case of FFa B<sub>2</sub>, the distances of the NH<sub>Phe1</sub> hydrogen atom with the C<sub>ε</sub><sup>to</sup> C-term carbon atoms of Phe2 are added.

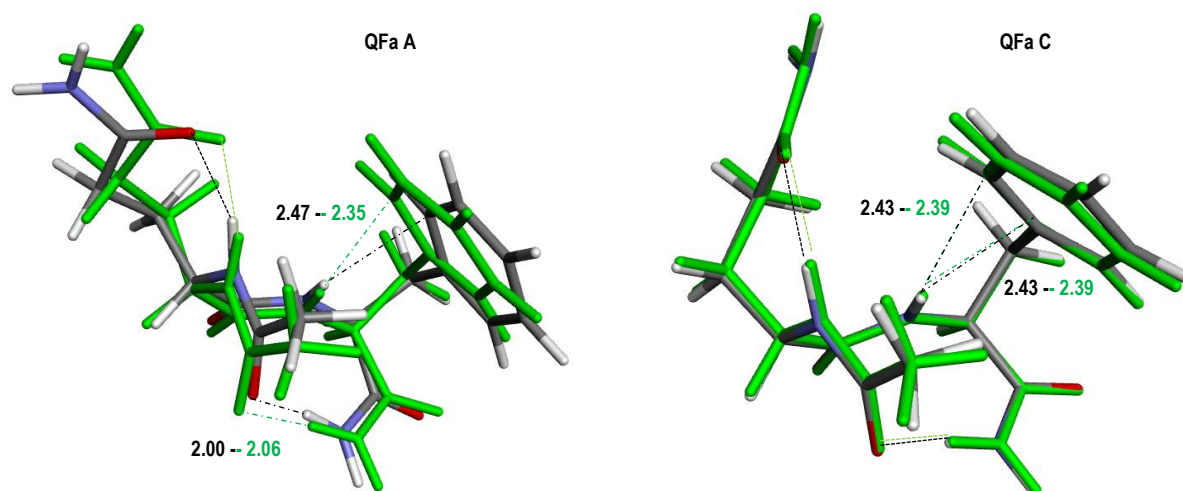

Figure S8-4: Comparison of the CC2/cc-pVDZ optimized geometry of the  $S_0$  (atom-based colors) and  $S_1$  states (green) of QFa A and C. For each conformer, the backbones have been overlapped. Only distances (dash-dot) that vary significantly ( $|d| > 0.01$  Å) between the ground and the excited state (see Table S7.4) are mentioned.

Appendix S9: *Amide A* region frequencies of both the ground ( $S_0$ ) and  $\pi\pi^*$  excited ( $S_1$ ) states of the Fm, GFa, FFa and QFa conformers.

| Conformer/State   |       | NH <sub>Phe</sub> | NH <sub>C-term</sub> |
|-------------------|-------|-------------------|----------------------|
| Fm A              | $S_1$ | 3592              | 3565                 |
|                   | $S_0$ | 3597              | 3609                 |
| Fm B              | $S_1$ | 3540              | 3463                 |
|                   | $S_0$ | 3587              | 3467                 |
| Fm C              | $S_1$ | 3552              | 3483                 |
|                   | $S_0$ | 3599              | 3487                 |
| <b>Experiment</b> |       |                   |                      |
| Fm A              | $S_1$ | 3433              | 3433                 |
|                   | $S_0$ | 3433              | 3460                 |
| Fm B              | $S_1$ | 3401              | 3342                 |
|                   | $S_0$ | 3433              | 3346                 |

Table S9-1: CC2/cc-pVDZ *amide A* region frequencies ( $\text{cm}^{-1}$ ) of both the ground ( $S_0$ ) and  $\pi\pi^*$  excited ( $S_1$ ) states of the Fm conformers, together with the available IR experimental ones ( $\text{cm}^{-1}$ ).

| Conformer/State   |       | NH <sub>Gln</sub> | NH <sub>Phe</sub> | NH <sub>2</sub><br>sym./C-term | NH <sub>2</sub><br>anti./C-term | NH <sub>2</sub><br>sym./Chain | NH <sub>2</sub><br>anti./Chain |
|-------------------|-------|-------------------|-------------------|--------------------------------|---------------------------------|-------------------------------|--------------------------------|
| QFa A             | $S_1$ | 3397              | 3570              | 3529                           | 3705                            | 3601                          | 3759                           |
|                   | $S_0$ | 3399              | 3582              | 3521                           | 3700                            | 3603                          | 3761                           |
| QFa B             | $S_1$ | 3415              | 3599              | 3514                           | 3689                            | 3522                          | 3695                           |
|                   | $S_0$ | 3458              | 3593              | 3517                           | 3688                            | 3567                          | 3722                           |
| QFa C             | $S_1$ | 3441              | 3560              | 3517                           | 3699                            | 3588                          | 3740                           |
|                   | $S_0$ | 3450              | 3576              | 3519                           | 3699                            | 3587                          | 3739                           |
| <b>Experiment</b> |       |                   |                   |                                |                                 |                               |                                |
| QFa A             | $S_0$ | 3285              | 3409              | 3365                           | 3519                            | 3442                          | 3562                           |
| QFa B             | $S_0$ | 3322              | 3445              | 3366                           | 3512                            | 3406                          | 3527                           |
| QFa C             | $S_0$ | 3336              | 3440              | 3367                           | 3514                            | 3426                          | 3557                           |

Table S9-2: CC2/cc-pVDZ *amide A* region frequencies ( $\text{cm}^{-1}$ ) of both the ground ( $S_0$ ) and  $\pi\pi^*$  excited ( $S_1$ ) states of the QFa conformers, together with the available IR experimental ones ( $\text{cm}^{-1}$ ).

| Conformer/State   |                | NH <sub>Gly</sub> | NH <sub>Phe</sub> | NH <sub>2sym.</sub> | NH <sub>2anti.</sub> |
|-------------------|----------------|-------------------|-------------------|---------------------|----------------------|
| GFa A             | S <sub>1</sub> | 3635              | 3434              | 3475                | 3675                 |
|                   | S <sub>0</sub> | 3642              | 3452              | 3480                | 3675                 |
| GFa A'            | S <sub>1</sub> | 3645              | 3443              | 3472                | 3668                 |
|                   | S <sub>0</sub> | 3647              | 3448              | 3474                | 3670                 |
| GFa B             | S <sub>1</sub> | 3643              | 3559              | 3538                | 3709                 |
|                   | S <sub>0</sub> | 3644              | 3596              | 3541                | 3710                 |
| GFa B'            | S <sub>1</sub> | 3626              | 3582              | 3530                | 3694                 |
|                   | S <sub>0</sub> | 3626              | 3603              | 3529                | 3695                 |
| GFa C             | S <sub>1</sub> | 3572              | 3569              | 3546                | 3695                 |
|                   | S <sub>0</sub> | 3567              | 3571              | 3561                | 3709                 |
| <b>Experiment</b> |                |                   |                   |                     |                      |
| GFa A             | S <sub>1</sub> | 3492              | 3302              | 3358                | 3510                 |
|                   | S <sub>0</sub> | 3494              | 3320              | 3355                | 3519                 |
| GFa A'            | S <sub>0</sub> | 3495              | 3322              | 3353                | 3517                 |
| GFa B             | S <sub>0</sub> | 3494              | 3445              | 3391                | 3521                 |
| GFa B'            | S <sub>1</sub> | 3494              | 3423              | 3387                | 3519                 |
|                   | S <sub>0</sub> | 3493              | 3441              | 3385                | 3518                 |
| GFa C             | S <sub>1</sub> | 3445              | 3408              | 3416                | 3535                 |
|                   | S <sub>0</sub> | 3444              | 3405              | 3425                | 3541                 |

Table S9-3: CC2/cc-pVDZ *amide A* region frequencies (cm<sup>-1</sup>) of both the ground (S<sub>0</sub>) and  $\pi\pi^*$  excited (S<sub>1</sub>) states of the GFa conformers, together with the IR available experimental ones (cm<sup>-1</sup>).



| Conformer/State    |                | NH <sub>Phe1</sub> | NH <sub>Phe2</sub> | NH <sub>2sym.</sub> | NH <sub>2anti.</sub> |
|--------------------|----------------|--------------------|--------------------|---------------------|----------------------|
| FFa A <sub>1</sub> | S <sub>1</sub> | 3540               | 3587               | 3545                | 3711                 |
| FFa A <sub>2</sub> | S <sub>1</sub> | 3576               | 3562               | 3547                | 3713                 |
| FFa A              | S <sub>0</sub> | 3581               | 3596               | 3549                | 3714                 |
| FFa B <sub>1</sub> | S <sub>1</sub> | 3509               | 3552               | 3483                | 3681                 |
| FFa B <sub>2</sub> | S <sub>1</sub> | 3487               | 3537               | 3489                | 3683                 |
| FFa B              | S <sub>0</sub> | 3520               | 3556               | 3489                | 3683                 |
| FFa C              | S <sub>1</sub> | 3595               | 3467               | 3458                | 3681                 |
|                    | S <sub>0</sub> | 3607               | 3541               | 3488                | 3692                 |
| <b>Experiment</b>  |                |                    |                    |                     |                      |
| FFa A <sub>1</sub> | S <sub>1</sub> | 3414               | 3438               | 3390                | 3524                 |
| FFa A <sub>2</sub> | S <sub>1</sub> | 3446               | 3414               | 3390                | 3524                 |
| FFa A              | S <sub>0</sub> | 3447               | 3438               | 3391                | 3524                 |
| FFa B              | S <sub>0</sub> | 3412               | 3430               | 3357                | 3514                 |
| FFa C              | S <sub>0</sub> | 3445               | 3418               | 3382                | 3518                 |

Table S9-4: CC2/cc-pVDZ *amide* A region frequencies (cm<sup>-1</sup>) of both the ground (S<sub>0</sub>) and  $\pi\pi^*$  excited (S<sub>1</sub>) states of the FFa conformers, together with the IR available experimental ones (cm<sup>-1</sup>).

Appendix S10: Experimental vs. CC2/cc-pVDZ calculated harmonic *amide A* region frequencies of both the  $S_0$  and  $S_1$  states of the series of capped peptides and the corresponding mode-dependent linear ( $v_{\text{exp.}} = av_{\text{theo.}} + b$ ) scaling functions.

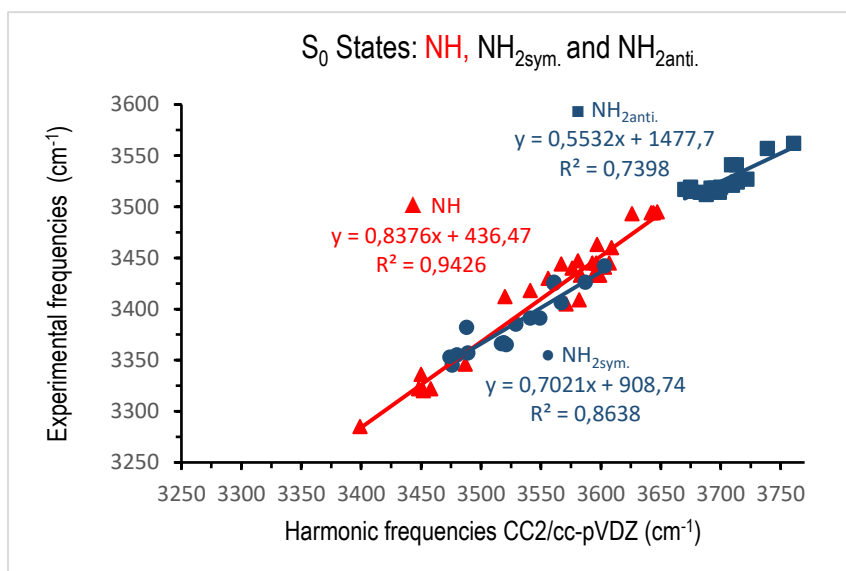

Figure S10-1: Experimental vs. CC2/cc-pVDZ calculated harmonic *amide A* region frequencies of the  $S_0$  states of the series of capped peptides and the corresponding mode-dependent linear ( $v_{\text{exp.}} = av_{\text{theo.}} + b$ ) scaling functions.

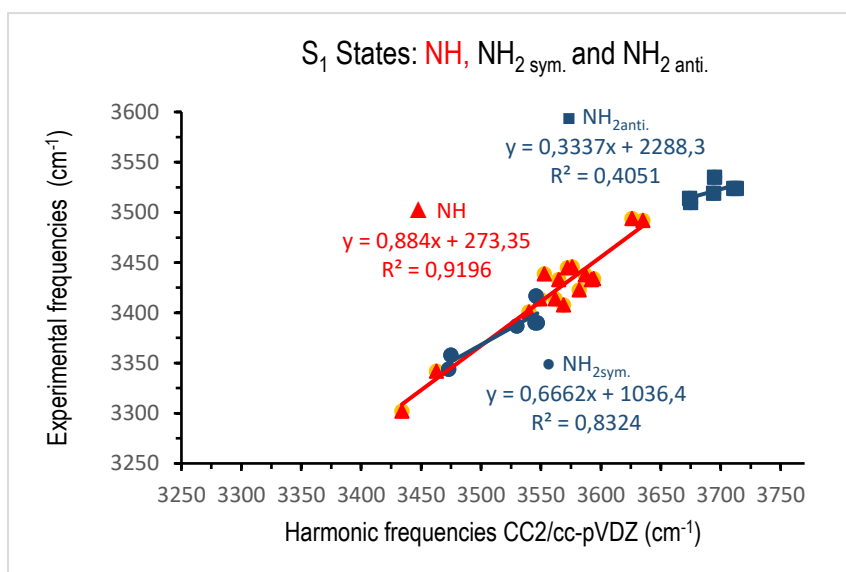

Figure S10-2: Experimental vs. CC2/cc-pVDZ calculated harmonic *amide A* region frequencies of the  $S_1$  states of the series of capped peptides and the corresponding mode-dependent linear ( $v_{\text{exp.}} = av_{\text{theo.}} + b$ ) scaling functions.

S11: DFT-D structures of the ground state of QFa A, B and C

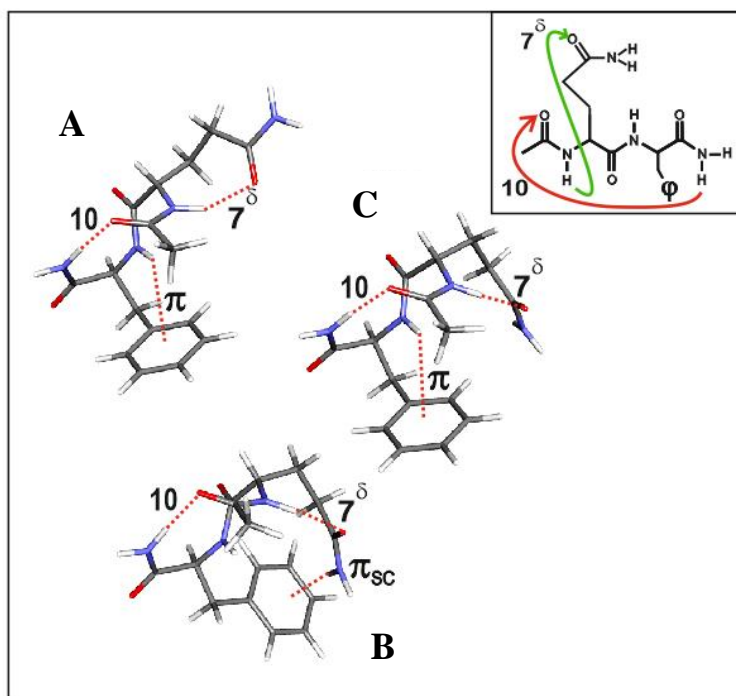

Figure S11: B97-D3 structures of the three most stable forms of QFa, which account for the conformer-selective IR spectra recorded (shown in Fig. 4). In these three forms the peptide backbone exhibits a  $\beta$ -turn structure stabilized by  $C_{10}$  H-bond and by a main chain/side chain H-bond, labelled  $7^\delta$  (see molecule sketch in the insert). The 3 conformers differ by the arrangement of the glutamine side chain relative to the backbone.

## References:

1. Chin, W.; Mons, M.; Dognon, J. P.; Piuzzi, F.; Tardivel, B.; Dimicoli, I. Competition between local conformational preferences and secondary structures in gas-phase model tripeptides as revealed by laser spectroscopy and theoretical chemistry. *Physical Chemistry Chemical Physics* **2004**, 6 (10), 2700-2709.
2. Alaudin, M.; Vaquero-Vara, V.; Habka, S.; Tardivel, B.; Gloaguen, E.; Mons, M., unpublished results.
